# Supplementary material for: Bias-dependent local structure of water molecules at a metallic interface
Source: Royal Society of Chemistry journal article supplement (doi:10.1039/c7sc02208e), 2017-10-11
Supplement: c7sc02208e1.pdf [file c7sc02208e1.pdf]

## Supplementary Information: Bias-dependent local structure of water molecule at a metallic interface

Luana S. Pedroza

*ICTP South American Institute for Fundamental Research,  
Instituto de Física Teórica, Universidade Estadual Paulista,  
São Paulo SP 01140-070, Brazil, and  
Centro de Ciências Naturais e Humanas, Universidade Federal do ABC,  
Santo André, São Paulo, Brazil 09210-170.*

Pedro Brandimarte

*Centro de Física de Materiales, 20018 Donostia-San Sebastián, Gipuzkoa Spain, and  
Donostia International Physics Center,  
20018 Donostia-San Sebastián, Gipuzkoa, Spain.*

Alexandre Reily Rocha

*Instituto de Física Teórica, Universidade Estadual Paulista,  
São Paulo, São Paulo SP 01140-070, Brazil*

M.-V. Fernández-Serra

*Department of Physics and Astronomy, Stony Brook University,  
Stony Brook, New York 11794-3800, USA, and  
Institute for Advanced Computational Sciences,  
Stony Brook University, Stony Brook, New York 11794-3800, USA*

## I. FORCES AS A FUNCTION OF BIAS

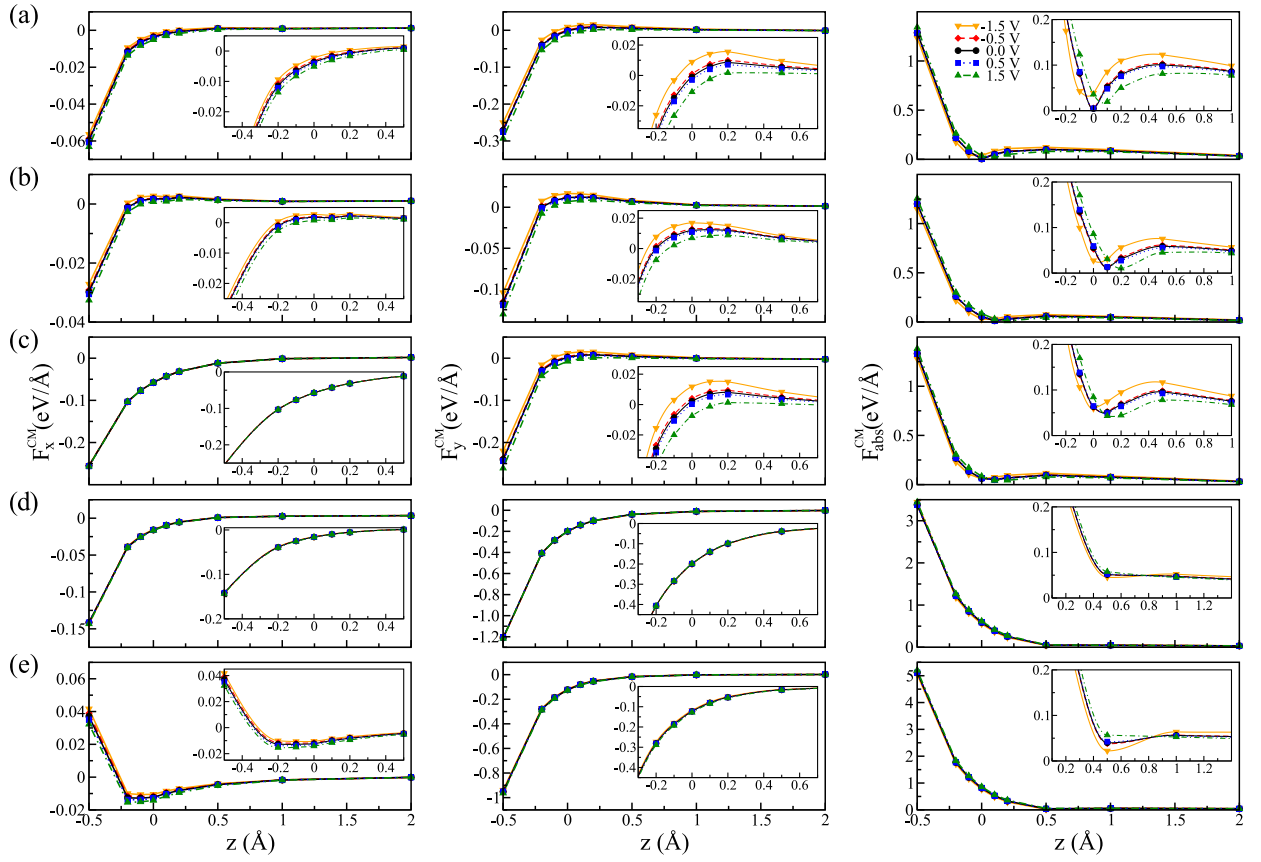

Figure S1.  $x$ - (left panel) and  $y$ -components (middle panel) of the forces on center of mass of the water molecule for the different structures considered in this work (shown in Figure 2 of the main manuscript). (right panel) Total force on the center of mass of the  $\text{H}_2\text{O}$  molecule. The  $z$ -component is presented in the main text.

## II. BADER CHARGES

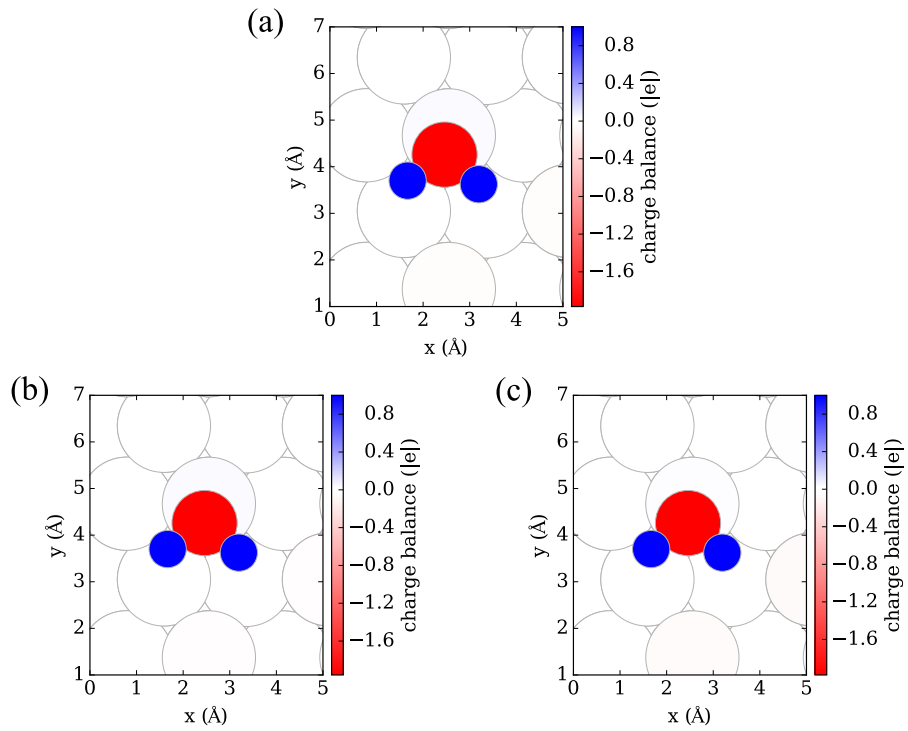

Figure S2. Bader valence charges on a water molecule adsorbed on an Au surface with different bias: (a)  $V = 0$  V, (b)  $V = -1.5$  V, and (c)  $V = 1.5$  V.

### III. DIPOLE MOMENT ESTIMATION

To analyze the effect of the electronic density redistribution on the water molecule we calculated the dipole moment  $\mathbf{p}_i^{\text{H}_2\text{O}}$  for a particular arrangement  $i$ . In general, the dipole moment is defined in terms of the difference in charge between the converged charge density and the corresponding atomic distributions

$$\mathbf{p} = \int \left( \rho_{tot}(\mathbf{r}) - \sum_{I=1}^{N_{atoms}} \rho_I(\mathbf{r}) \right) (\mathbf{r} - \mathbf{r}_0) d\mathbf{r} \quad (\text{S1})$$

in such a way that

$$\int \left( \rho_{tot}(\mathbf{r}) - \sum_{I=1}^{N_{atoms}} \rho_I(\mathbf{r}) \right) \sim 0. \quad (\text{S2})$$

As we are interested in the dipole moment of the water molecule alone, for each bias  $V$ , we remove the effect of an equivalent parallel plate capacitor with potential  $V$ ,

$$\rho_{tot}(V) = \rho_{Au+H_2O}(V) - \left( \rho_{Au}(V) - \sum_{I=1}^{N_{Au}} \rho_I^{Au}(\mathbf{r}) \right). \quad (\text{S3})$$

All calculations are performed using  $\mathbf{r}_0 = \mathbf{r}_{\text{CM}}$ , and, in order to guarantee charge neutrality of the charge density, the limits of integration are chosen as to satisfy equation S2.
